# Supplementary material for: Evaluation of performance metrics for high energy density rechargeable lithium–oxygen batteries
Source: Royal Society of Chemistry journal article supplement (doi:10.1039/d3fd00082f), 2023-08-14
Supplement: d3fd00082f1.pdf [file d3fd00082f1.pdf]

## Supporting information

### Evaluation of performance metrics for high energy density rechargeable lithium–oxygen batteries

Shoichi Matsuda <sup>\*ab</sup>, Eiki Yasukawa <sup>ab</sup>, Shin Kimura <sup>ab</sup>, Shoji Yamaguchi <sup>ab</sup>, Kohei Uosaki <sup>ab</sup>

<sup>a</sup>Center for Green Research on Energy and Environmental Materials, National Institute for Materials Science, 1-1 Namiki, Tsukuba, Ibaraki 305-0044, Japan

<sup>b</sup>NIMS-SoftBank Advanced Technologies Development Center, National Institute for Materials Science, 1-1 Namiki, Tsukuba, Ibaraki 305-0044, Japan.

\*Corresponding Authors:

Shoichi Matsuda, Email: MATSUDA.Shoichi@nims.go.jp

**Table S1.** Parameters of LOB cells used in discharge/charge test.

|                       |              |      |                    |
|-----------------------|--------------|------|--------------------|
| SUS fiber mesh        | Mass loading | 3.5  | mg/cm <sup>2</sup> |
|                       | Thickness    | 30   | μm                 |
| Carbon fiber membrane | Mass loading | 8.4  | mg/cm <sup>2</sup> |
|                       | Thickness    | 190  | μm                 |
| Carbon electrode      | Mass loading | 5.4  | mg/cm <sup>2</sup> |
|                       | Thickness    | 300  | μm                 |
| Separator             | Mass loading | 1.08 | mg/cm <sup>2</sup> |
|                       | Thickness    | 20   | μm                 |
| Lithium foil          | Mass loading | 5.34 | mg/cm <sup>2</sup> |
|                       | Thickness    | 100  | μm                 |
| Copper foil           | Mass loading | 10.8 | mg/cm <sup>2</sup> |
|                       | Thickness    | 12   | μm                 |
| Electrolyte           |              | 22   | mg/cm <sup>2</sup> |

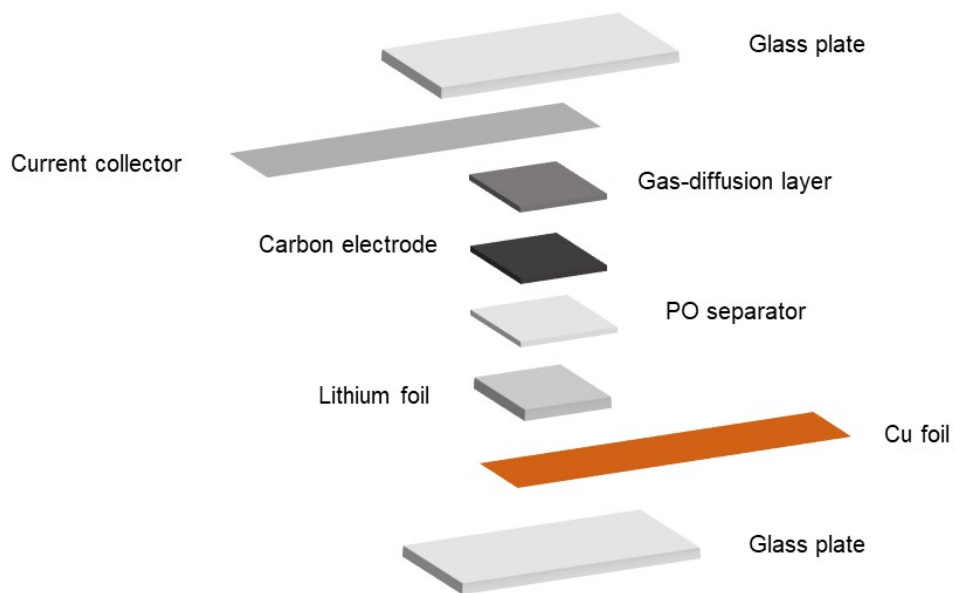

**Figure S1.** Schematic illustration of cell configuration of LOBs cells.

**Table S2.** Physical parameters of gas-diffusion layers.

| Sample                   | Material       | Structure       | Weight<br>[mg/cm <sup>2</sup> ] | Thickness<br>[μm] | Fiber<br>diameter<br>[μm] | Sheet<br>resistance<br>[ohm/square] |
|--------------------------|----------------|-----------------|---------------------------------|-------------------|---------------------------|-------------------------------------|
| Carbon-fiber membrane    | Carbon         | Random          | 8.4                             | 190               | 5                         | 0.66                                |
| SUS fiber mesh           | SUS-304        | Mesh            | 3.5                             | 30                | 13                        | 0.42                                |
| Ni-coated PET-fiber mesh | Nickel and PET | Mesh            | 1.4                             | 50                | 27                        | 1.3                                 |
| PTFE membrane            | PTFE           | Porous membrane | 2.6                             | 90                |                           | >10 <sup>3</sup>                    |

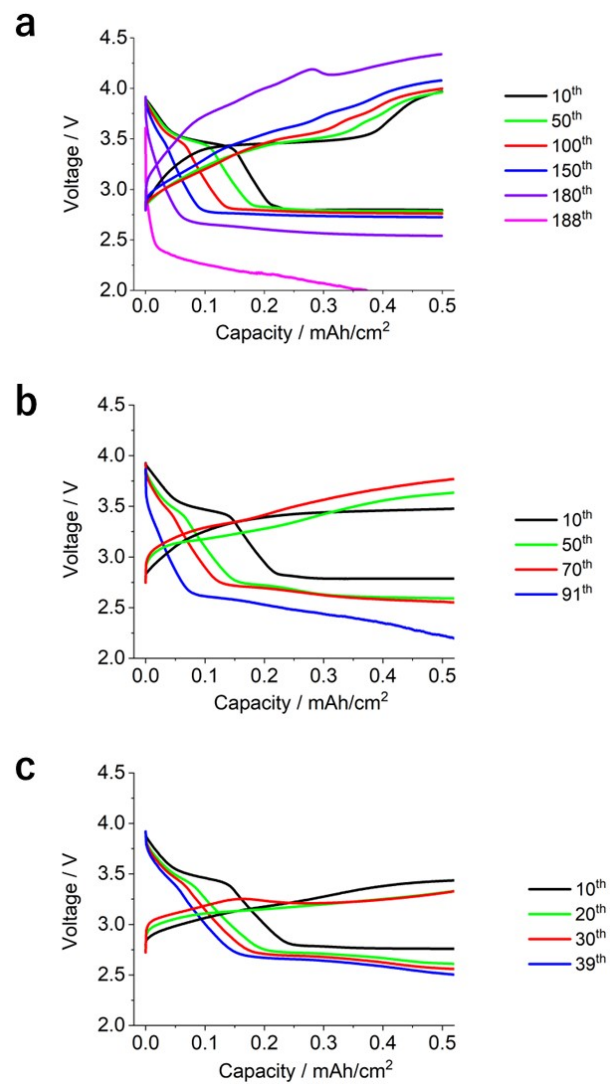

**Figure S2.** Magnified discharge/charge profile of LOB cells with different capacity limitation and current density conditions. (a) 0.05 mA/cm<sup>2</sup>, 0.5 mAh/cm<sup>2</sup>, (b) 0.1 mA/cm<sup>2</sup>, 1 mAh/cm<sup>2</sup>, (c) 0.2 mA/cm<sup>2</sup>, 2 mAh/cm<sup>2</sup>.

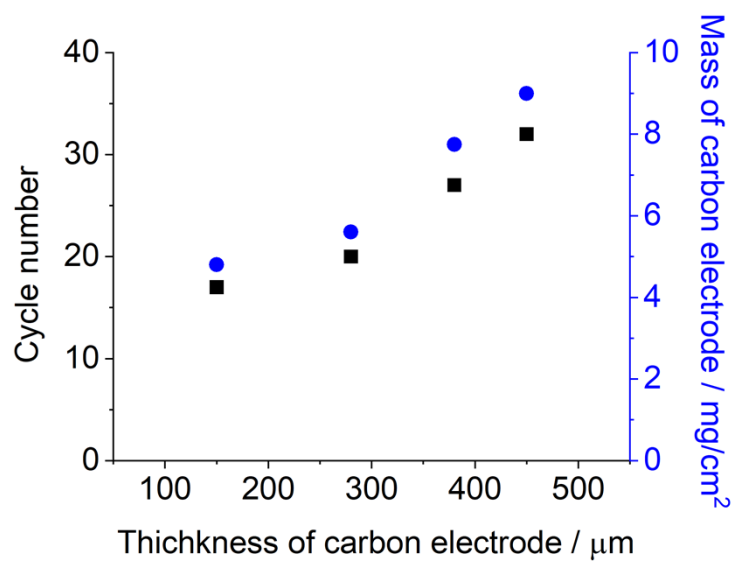

**Figure S3.** Relationships between cycle number, mass of carbon electrode and thickness of carbon electrode.

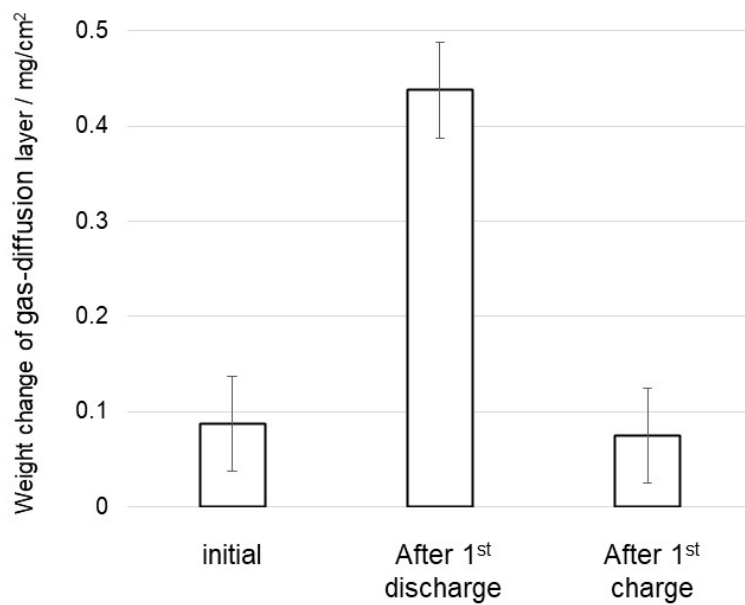

**Figure S4.** Weight change of gas-diffusion layer during 1<sup>st</sup> discharge/charge process.
